# Supplementary material for: Neutrophil extracellular traps promote scar formation in post-epidural fibrosis
Source: PubMed Central journal article supplement (PMC7599244; doi:10.1038/s41536-020-00103-1), 2020-10-30
Supplement: 41536_2020_103_MOESM2_ESM.pdf [file 41536_2020_103_MOESM2_ESM.pdf]

Figure 1E

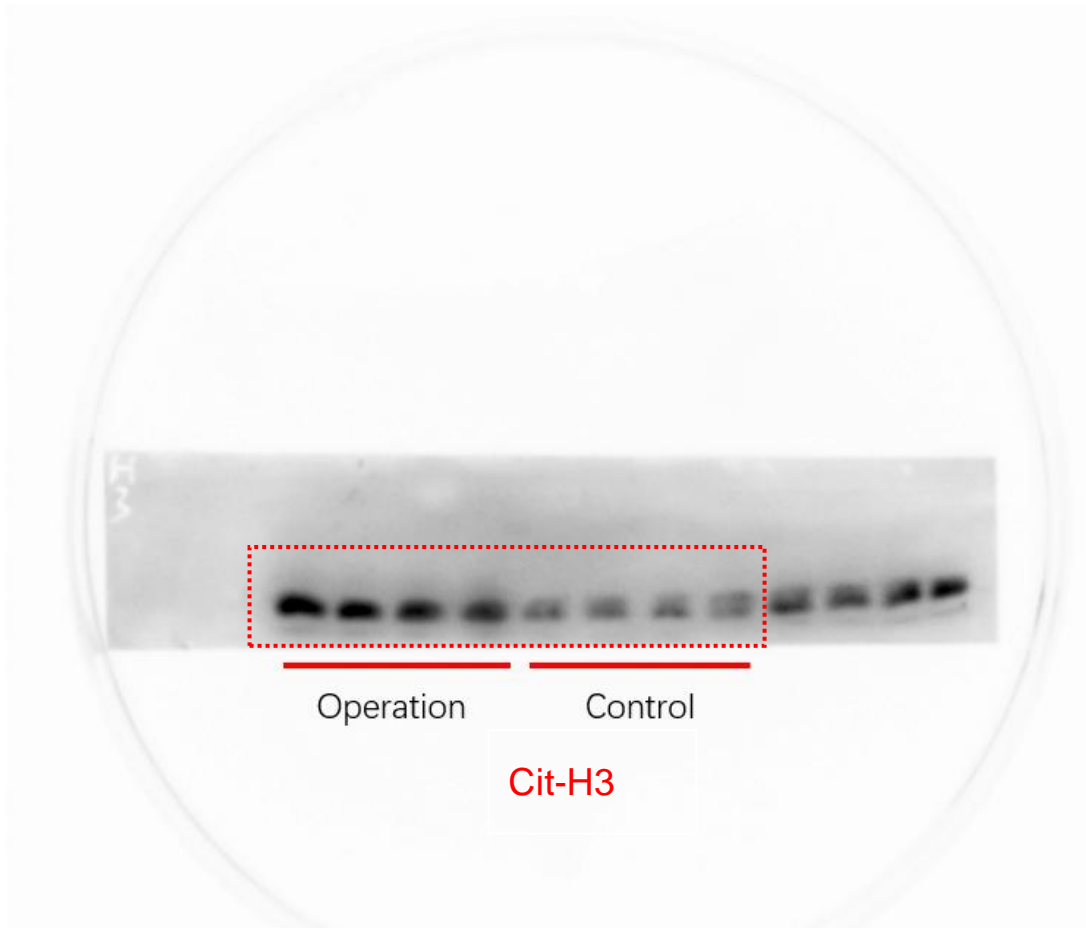

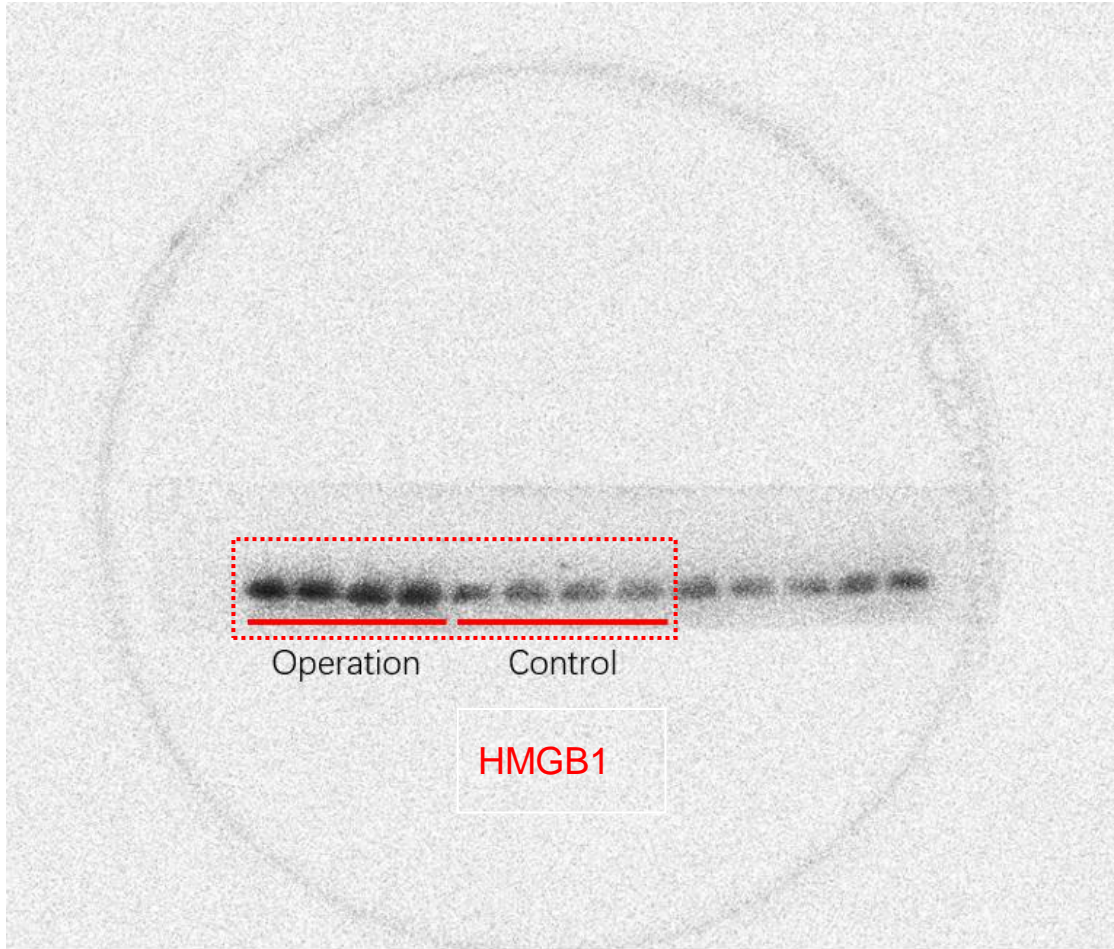

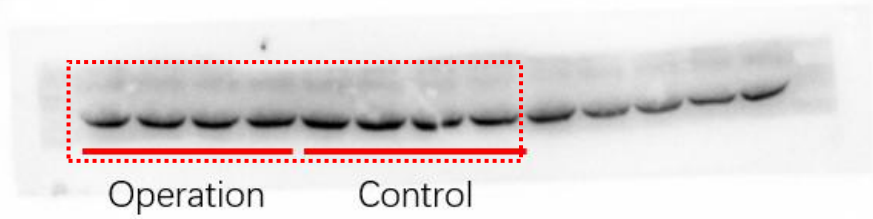

$\beta$ -actin

Figure 3A

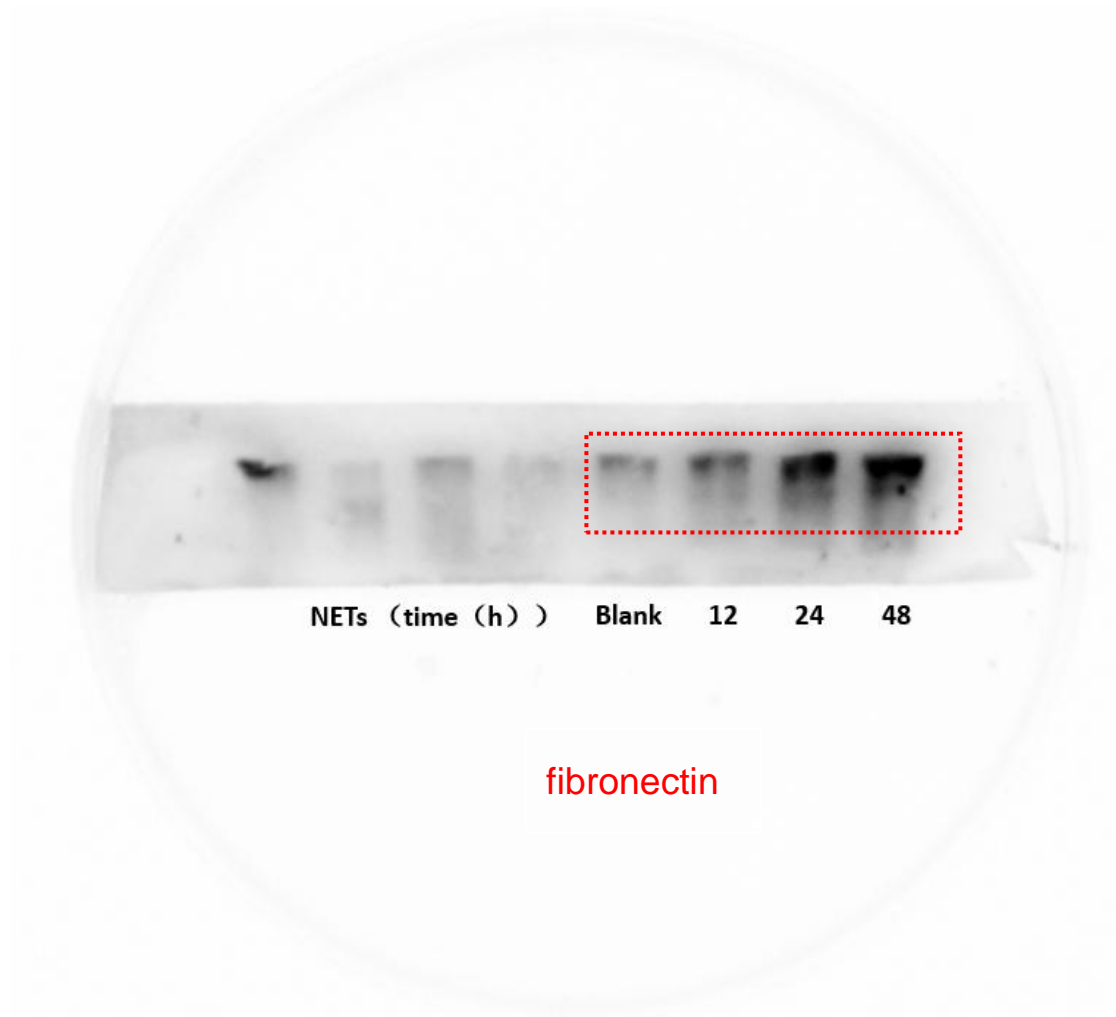

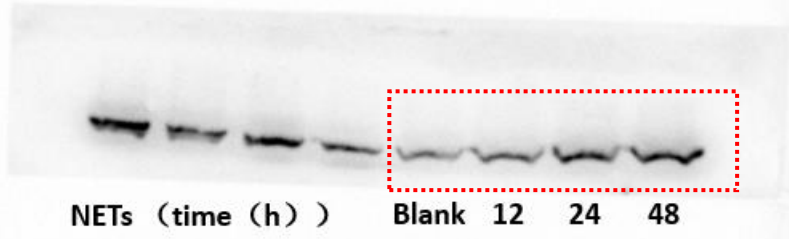

$\alpha$ -SMA

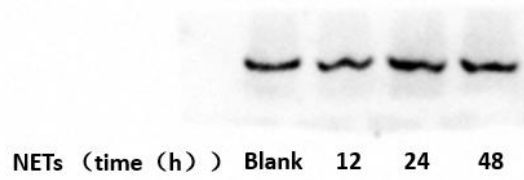

$\beta$ -actin

Figure 3D

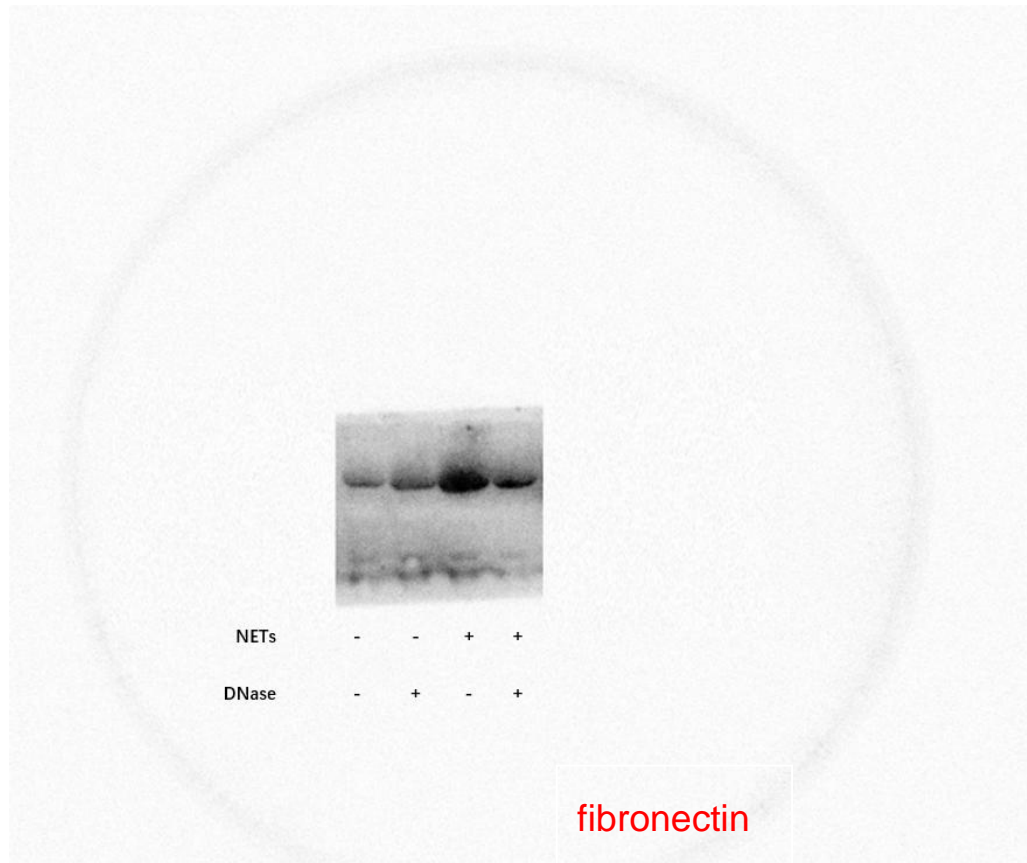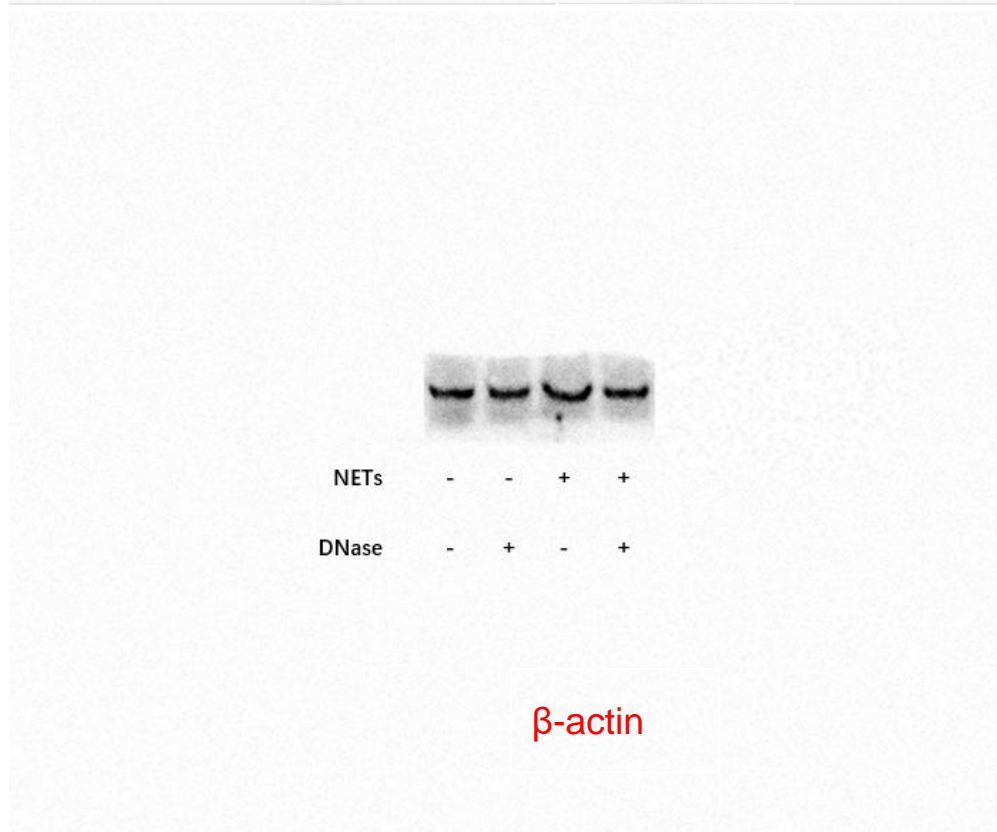

Figure 3E

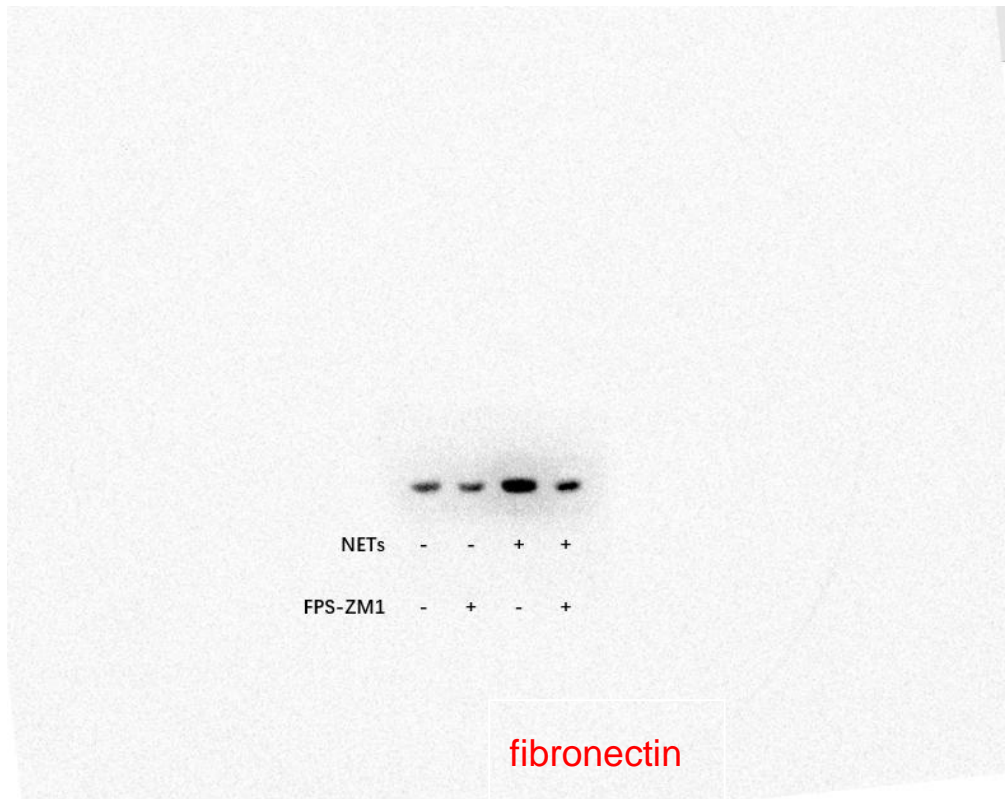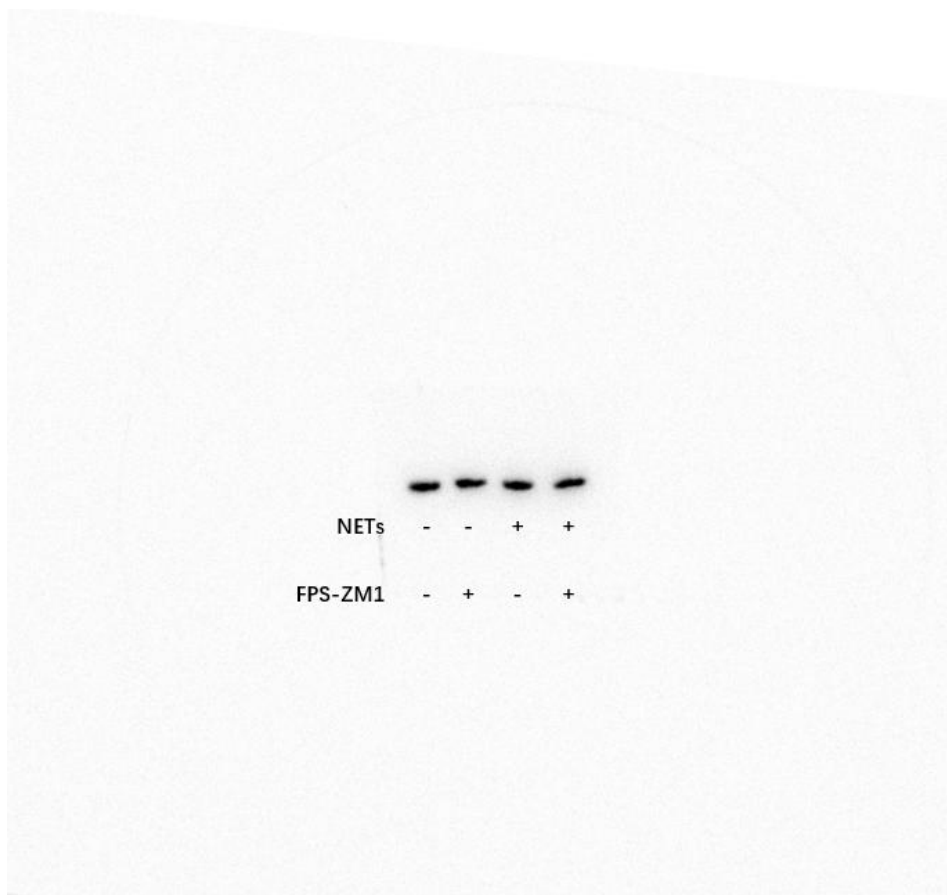

Figure 4A

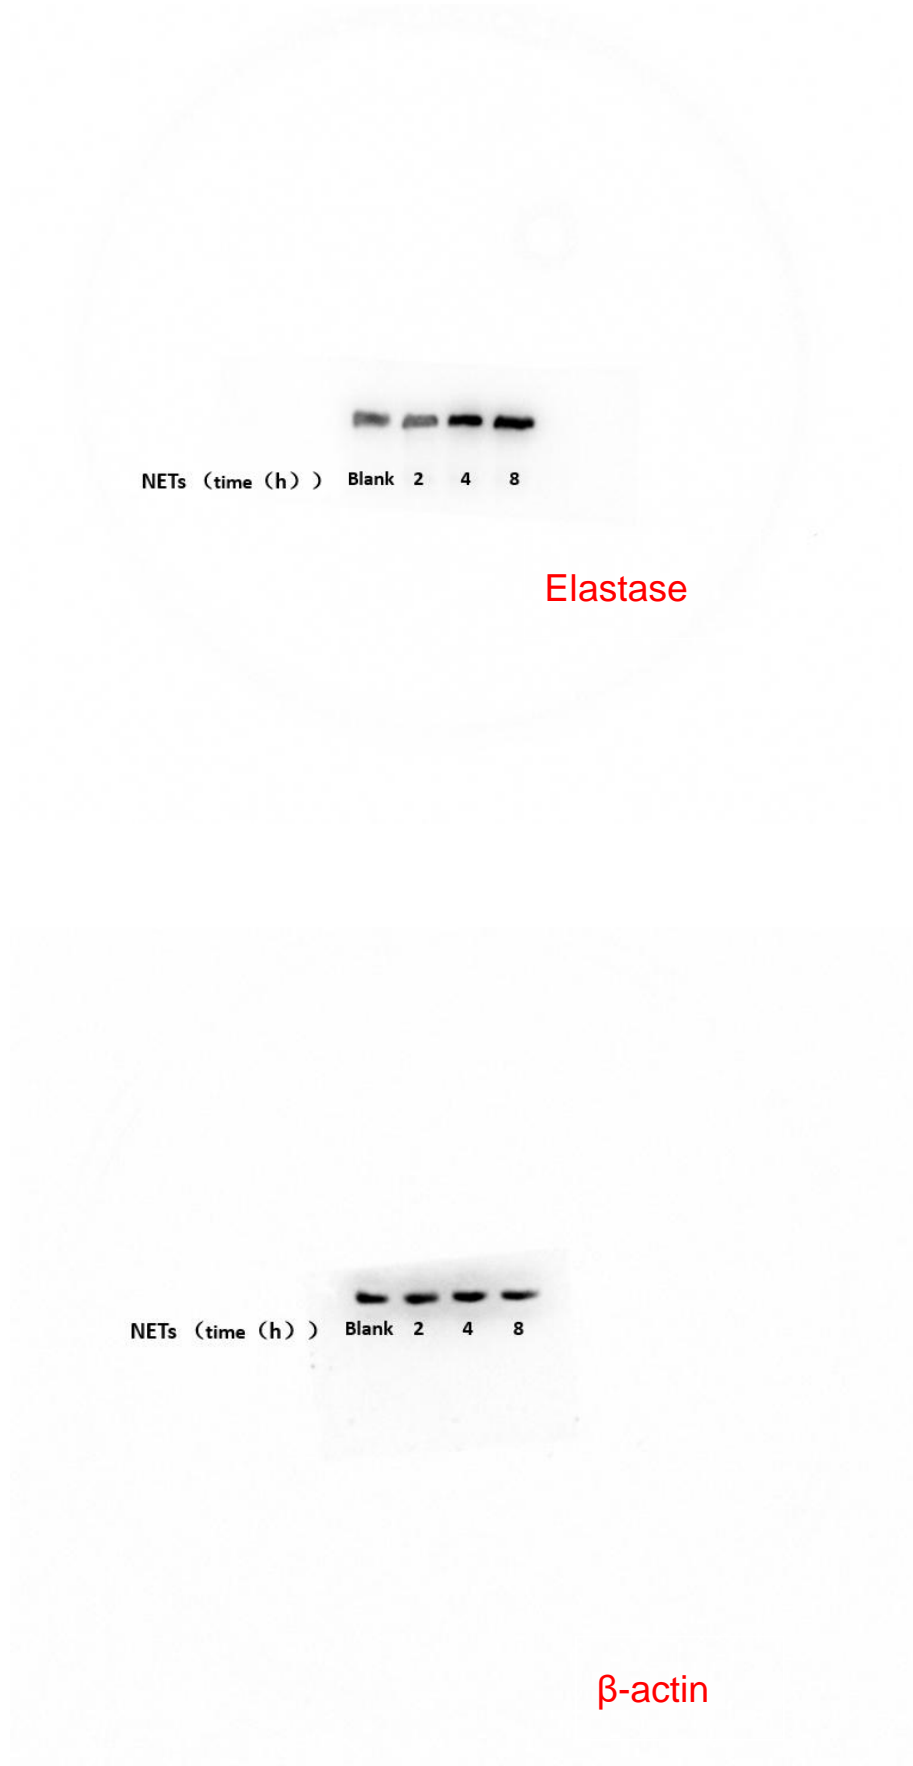



Figure 4B

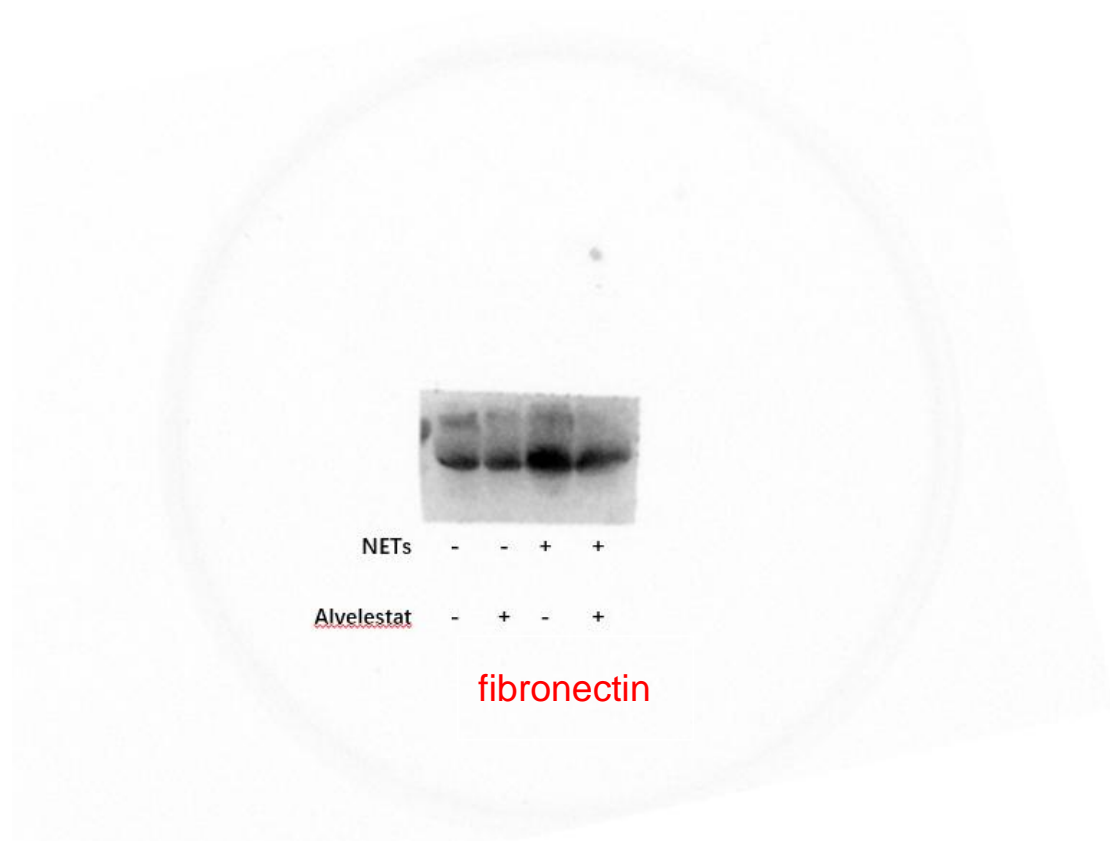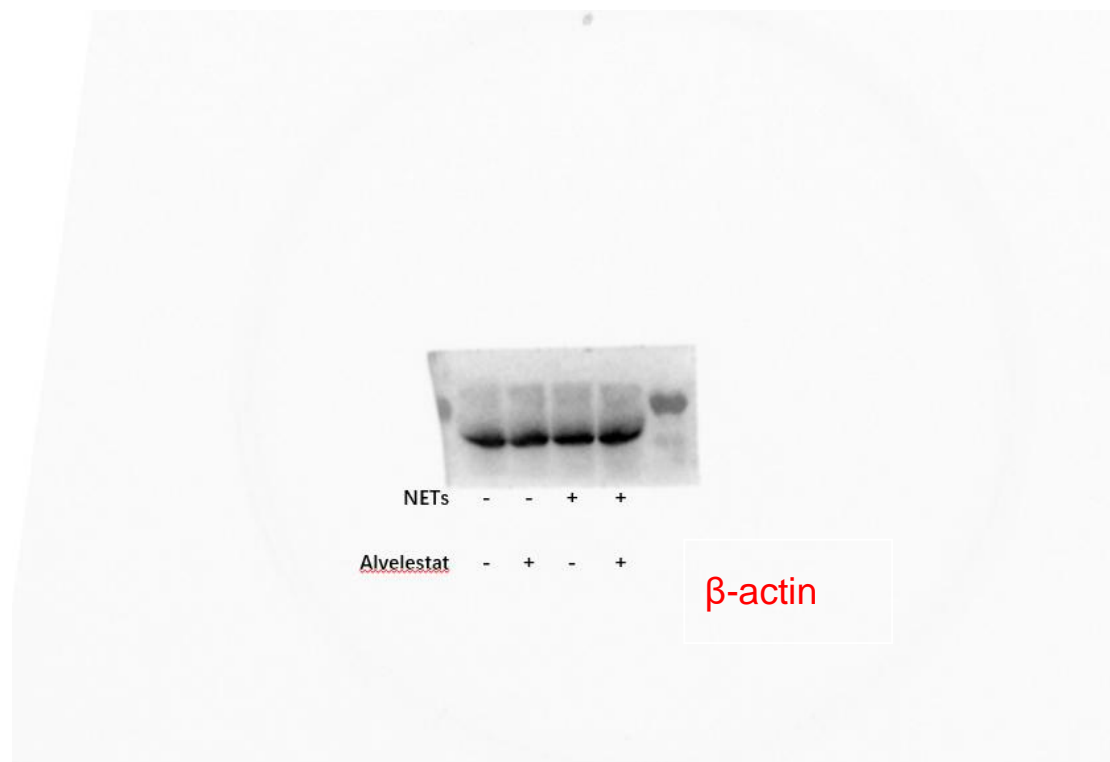

Figure 4C

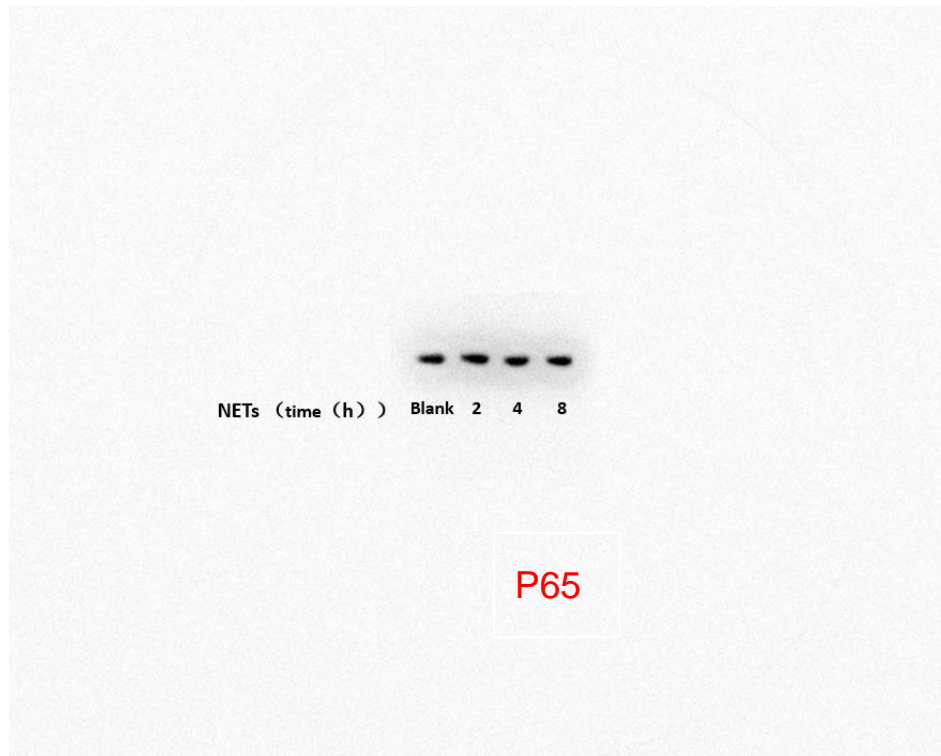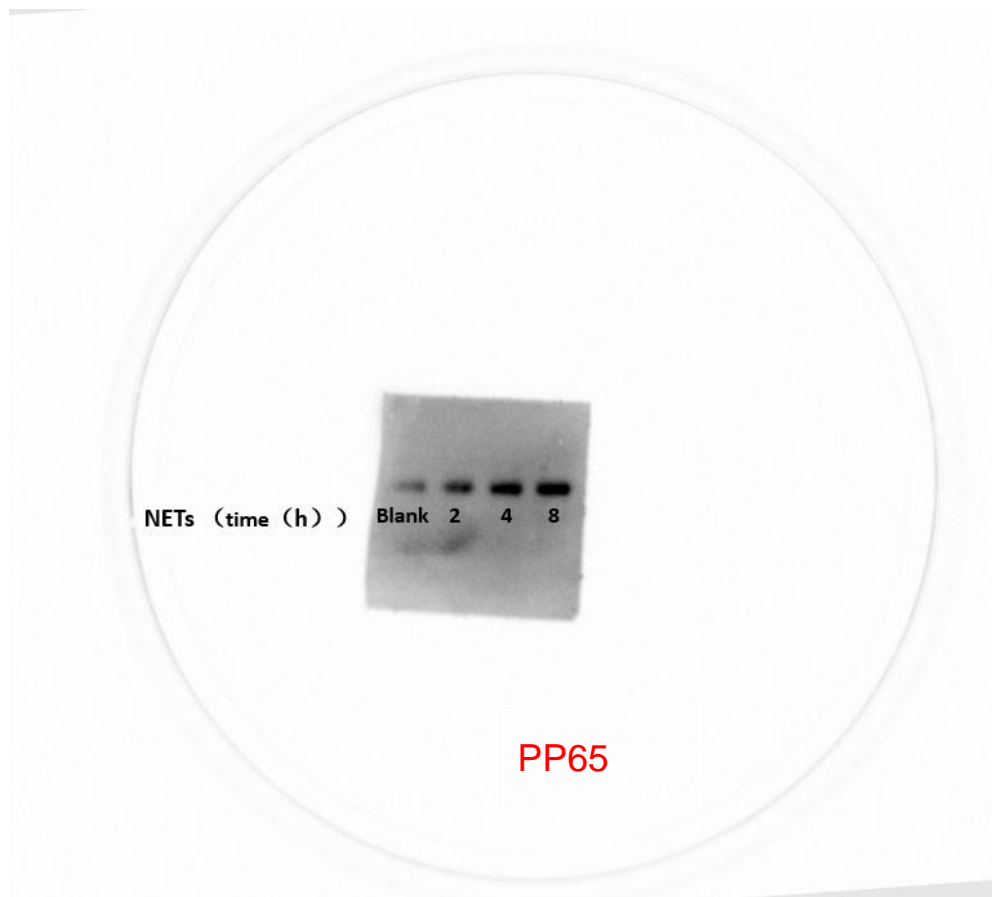

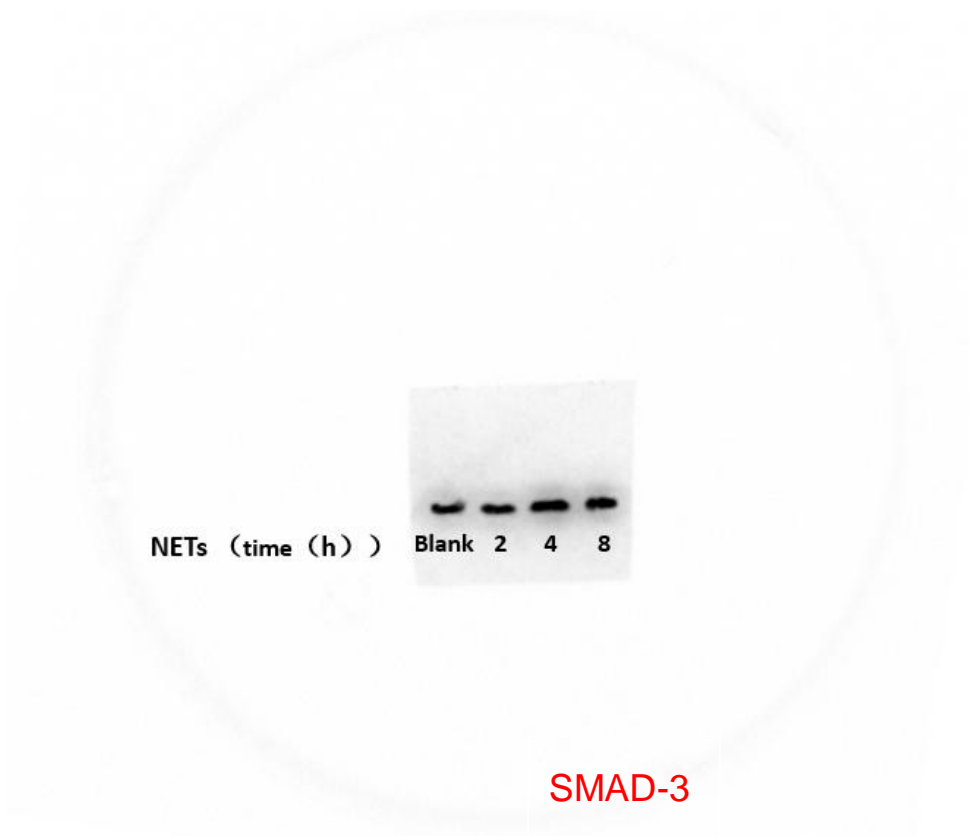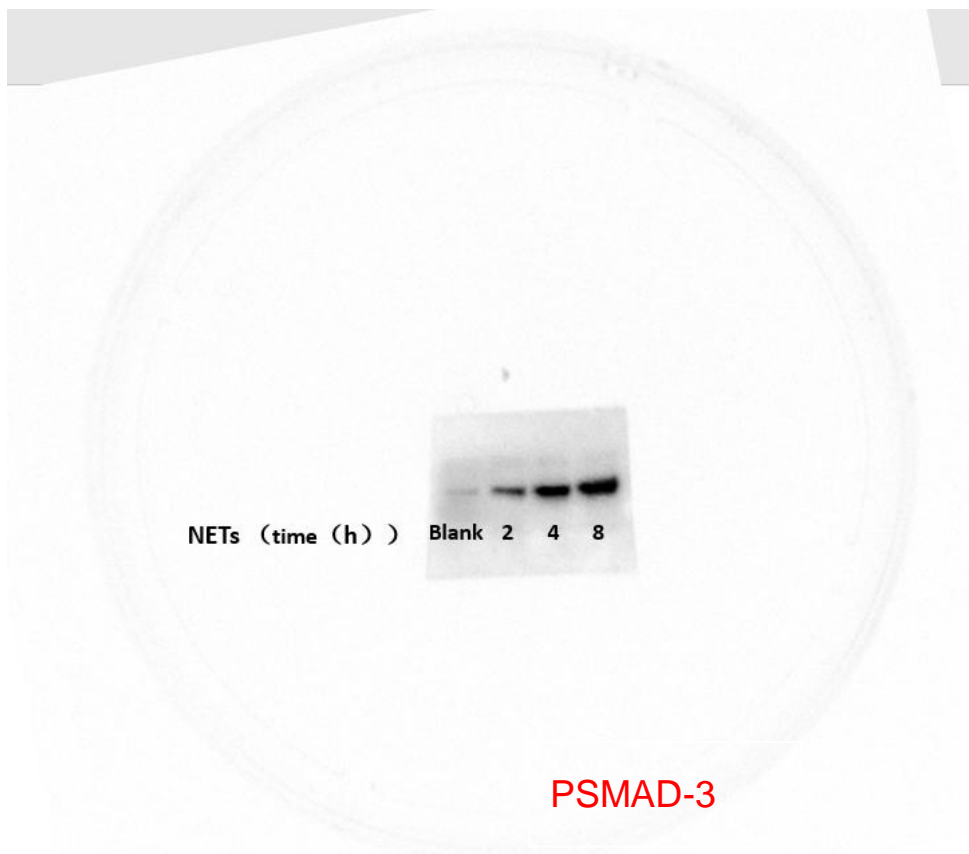

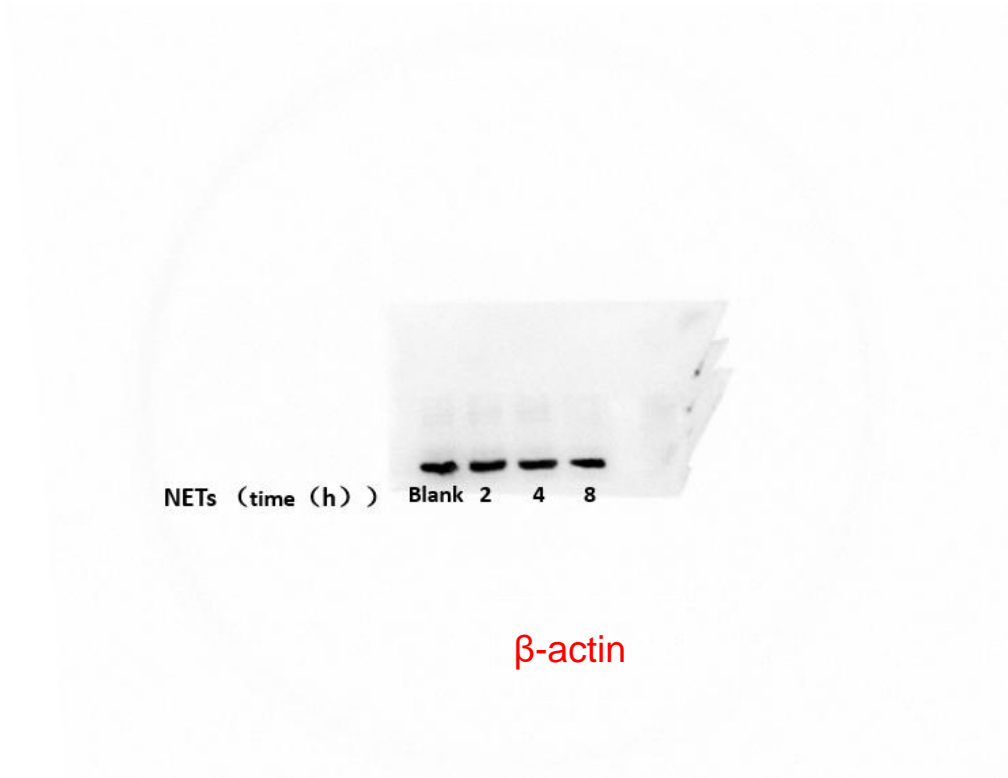

Figure 4D

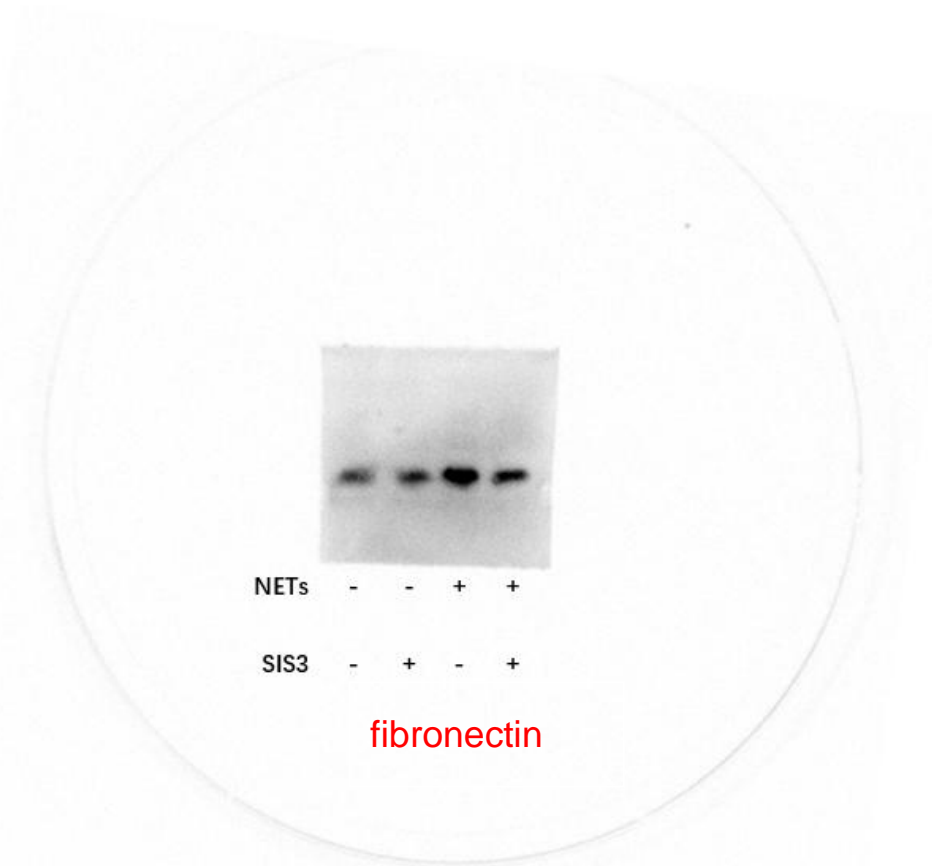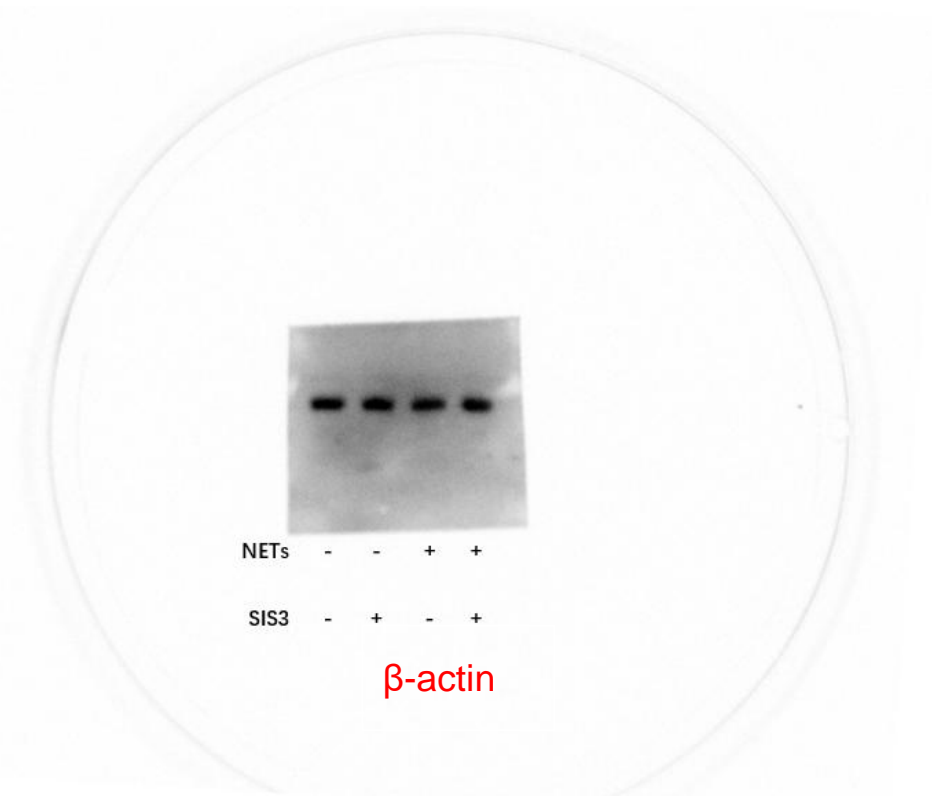

Figure 4E

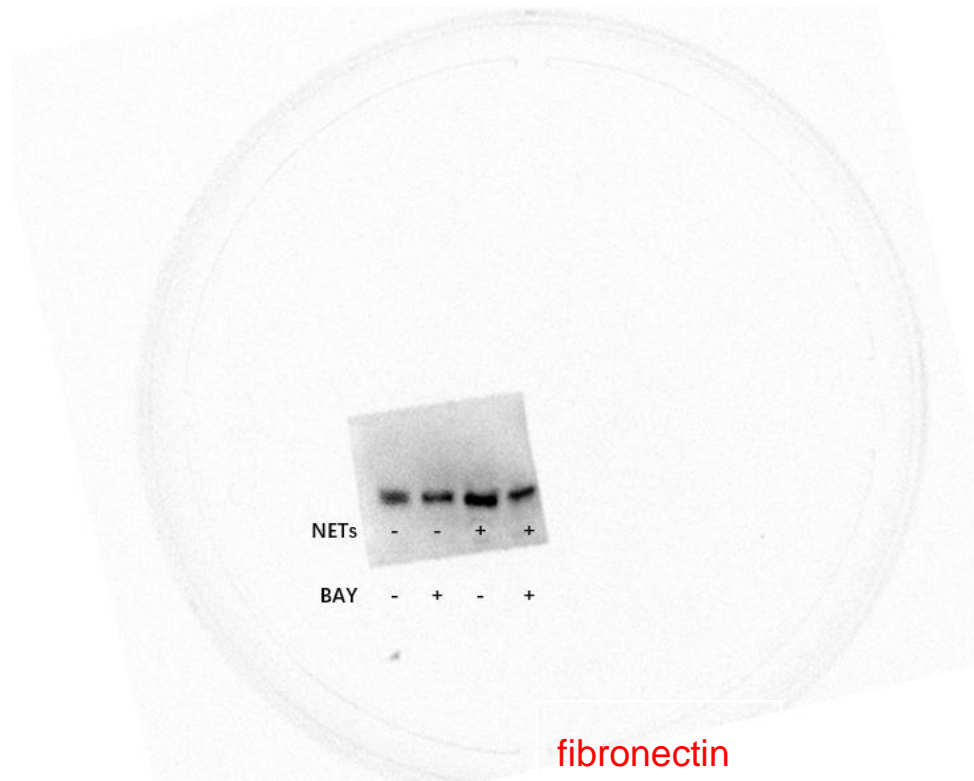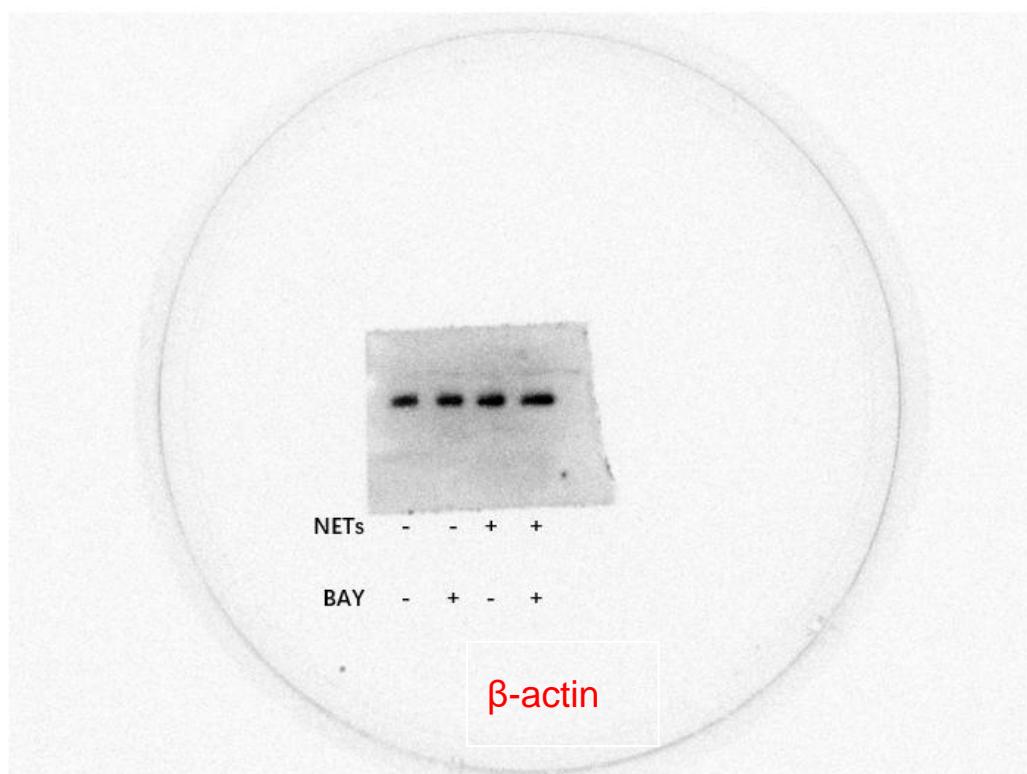

1 **Supplementary video 1 Live cell imaging of NETs ingested by**  
2 **macrophages.** NETs were labeled with Sytox green (pseudo-green);  
3 macrophages were labeled with DDAO-SE (pseudo-red); live cell imaging  
4 showed that NETs became yellow if ingested into macrophages.  
5
